# Supplementary material for: Decoding a cryptic mechanism of metronidazole resistance among globally disseminated fluoroquinolone-resistant Clostridioides difficile
Source: PubMed Central journal article supplement (PMC10338468; doi:10.1038/s41467-023-39429-x), 2023-07-12
Supplement: 41467_2023_39429_MOESM3_ESM.pdf [file 41467_2023_39429_MOESM3_ESM.pdf]

## **Description of Additional Supplementary Files:**

**Supplementary Data 1.** Strains of *C. difficile* studied.

**Supplementary Data 2.** Primers used in this study.

**Supplementary Data 3.** Genetically constructed strains from this study.
